# Supplementary material
Source: Springer Nature journal article supplement (https://www.springermedizin.de/resource/supplementary/12931_2013_1411_MOESM6_ESM.pdf/9426198)

Resistance

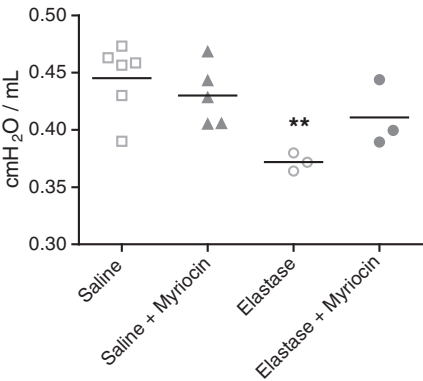

Dynamic Compliance

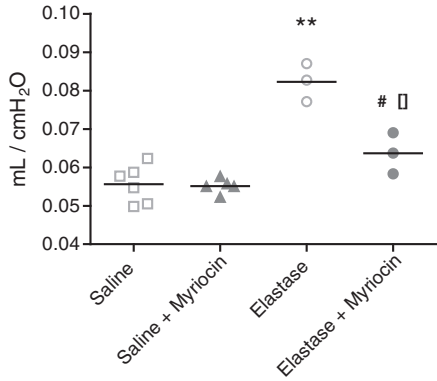

Tissue-Specific Elastance

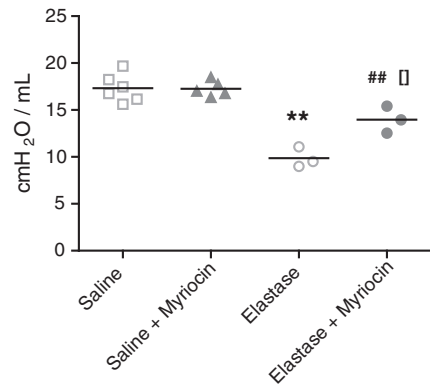

Total Lung Capacity

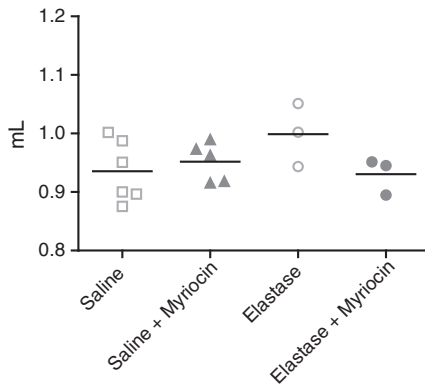

Supplement: MOESM6 [file 9426198]
